# Supplementary material for: Structural basis for promotion of duodenal iron absorption by enteric ferric reductase with ascorbate
Source: PubMed Central journal article supplement (PMC6123691; doi:10.1038/s42003-018-0121-8), 2018-08-17
Supplement: 42003_2018_121_MOESM1_ESM.pdf [file 42003_2018_121_MOESM1_ESM.pdf]

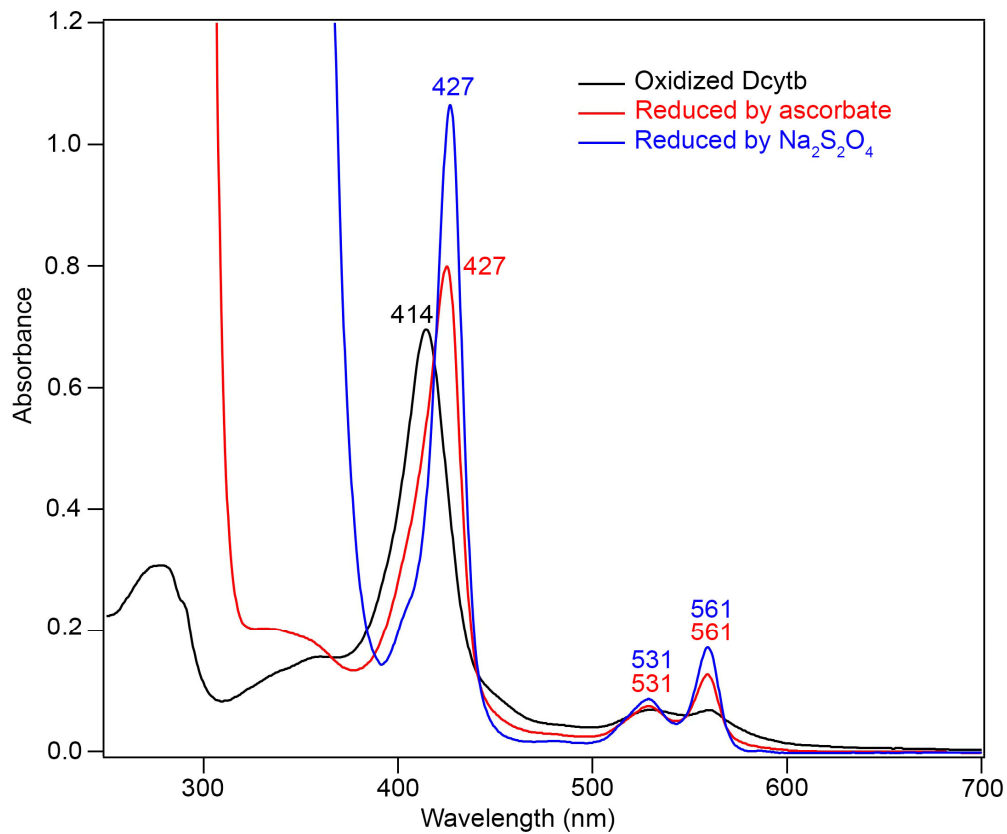

**Supplementary Fig. 1. Electronic absorption spectra of oxidized and reduced Dcytb.** The spectrum of Dcytb with ferriheme (black) is shown with the spectrum of Dcytb with ferroheme reduced by ascorbate (red) and dithionite (blue). The spectrum was measured in MES-Na buffer (50 mM, pH 6.5) containing NaCl (150 mM) and DDM (0.025 %) at room temperature.

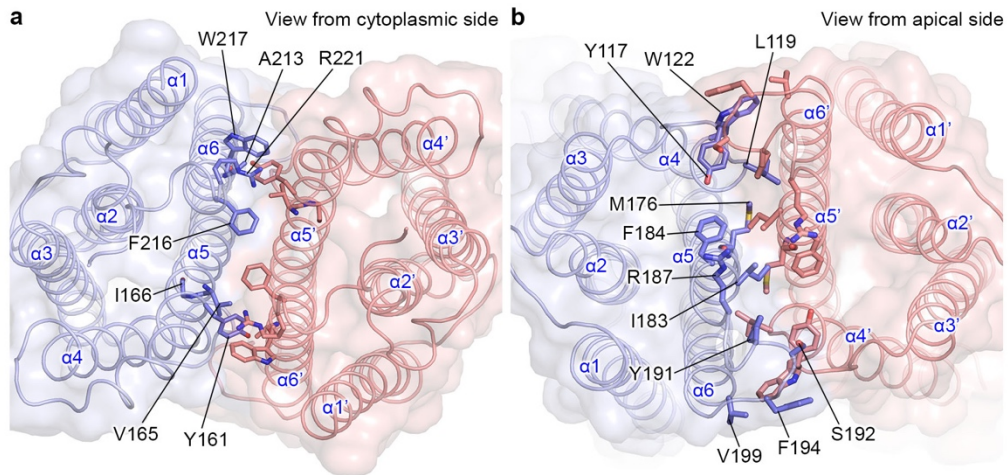

**Supplementary Fig. 2. Homodimeric structure of Dcytb.** Residues from each monomer (shown in light blue and salmon) associate with each other through hydrophobic interactions. **a.** View from the cytoplasmic side. Hydrophobic interactions involve residues from  $\alpha$ -helices 5 and 6 of each monomer. **b.** View from the apical side. Hydrophobic interactions involve residues from  $\alpha$ -helices 4, 5 and 6 of each monomer.

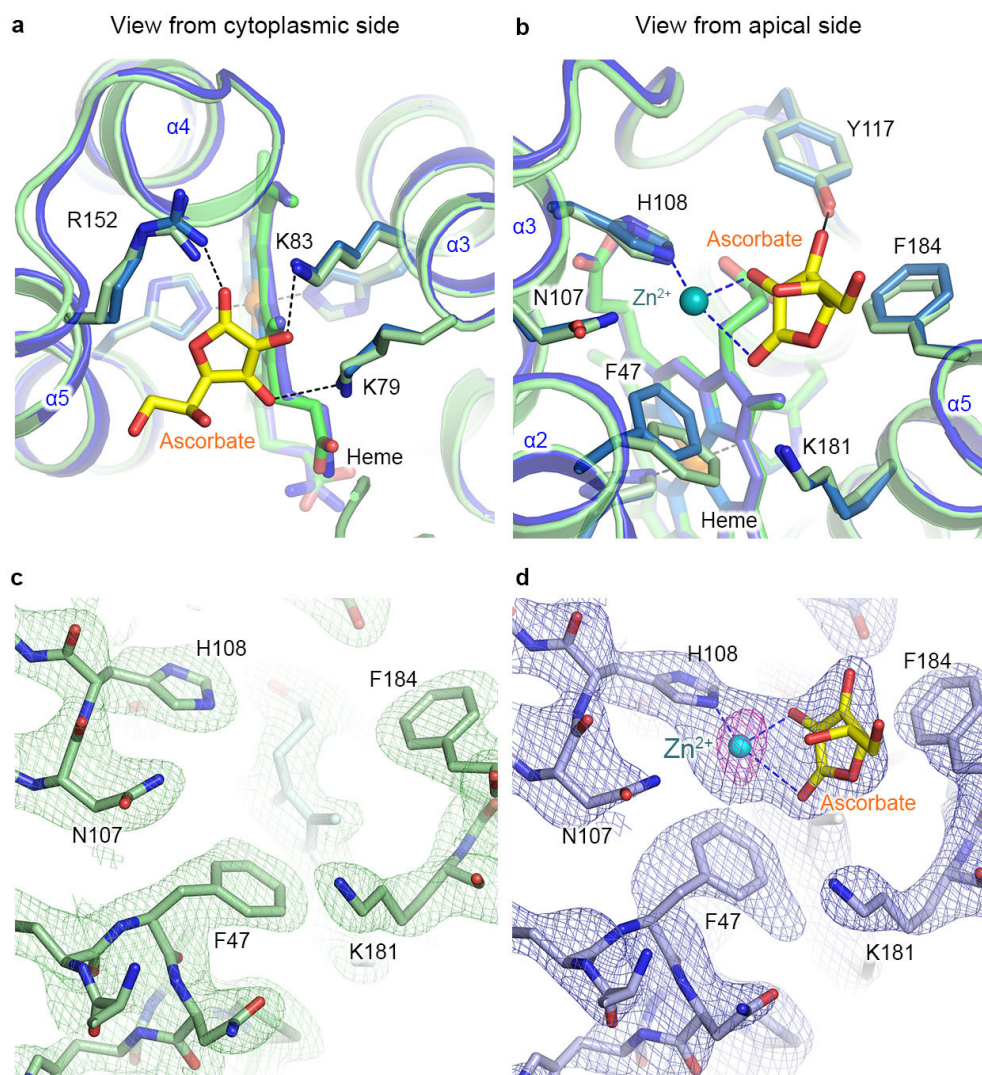

**Supplementary Fig. 3. Superposition of apo- and holo- Dcytb.** **a.** Close-up view of the superposition from the cytoplasmic side. Residues that interact with ascorbate are shown as sticks. **b.** Close-up view of the superposition from apical side. Residues that coordinate  $Zn^{2+}$ -ascorbate are shown as sticks. Of the amino acid residues in this vicinity, only F47 exhibits any change in orientation upon  $Zn^{2+}$ -ascorbate binding. **c.** Electron density map of residues around apical side of apo-Dcytb, contoured at  $1.5\sigma$ . **d.** Electron density map of residues around apical side of holo-Dcytb, contoured at  $1.5\sigma$ . Density of F47 changed upon  $Zn^{2+}$ -ascorbate binding.

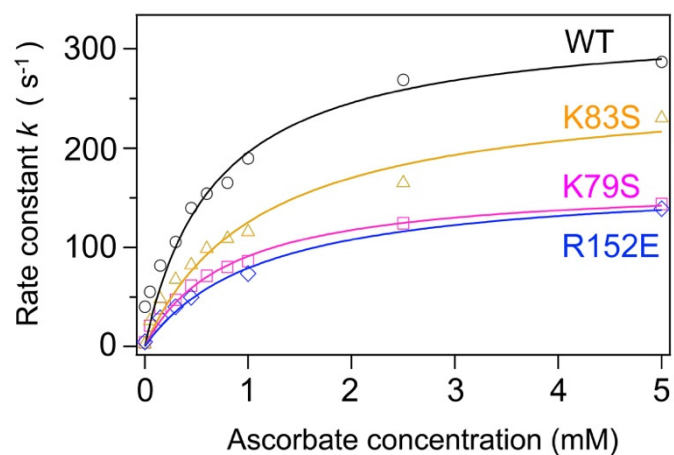

**Supplementary Fig. 4. Dependence of the initial phase of heme reduction of wild-type and variant forms of Dcytb on [Ascorbate].** In comparison to the wild-type enzyme, the rates of K79S and R152E reduction are nearly halved while the rate of K83S reduction is reduced by ~20% (Supplementary Table 1).

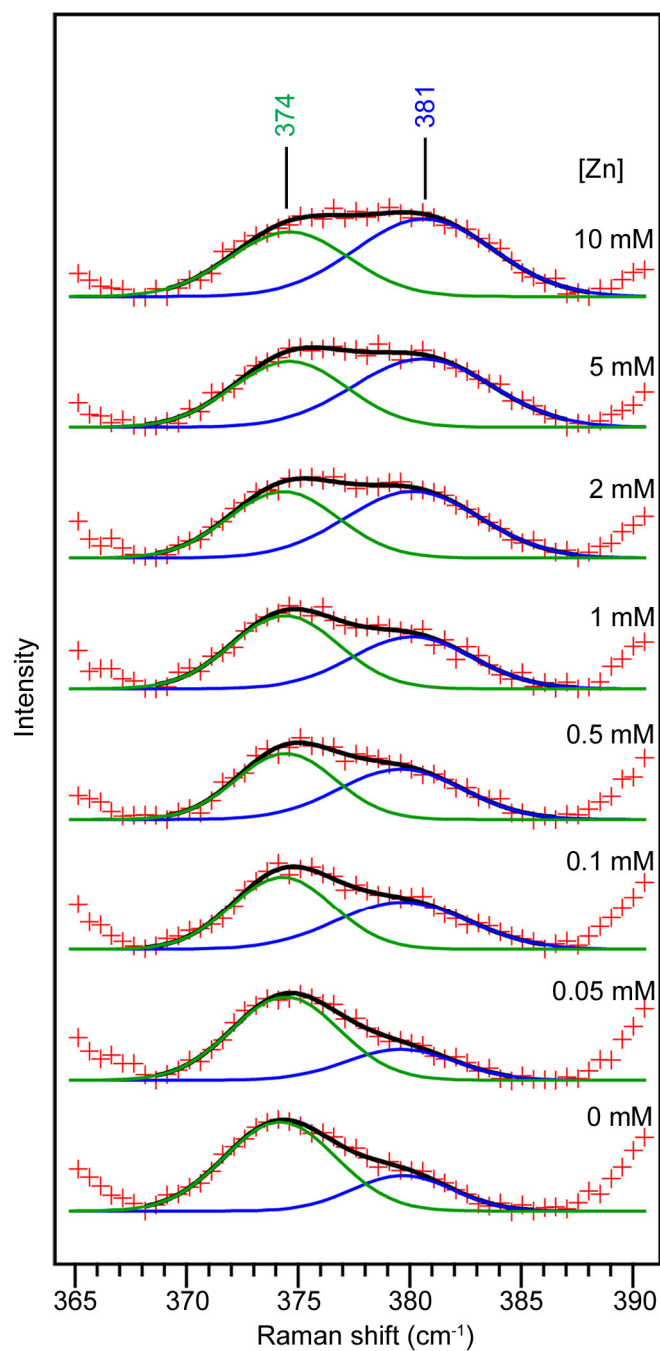

**Supplementary Fig. 5. Titration of Dcytb with Zn<sup>2+</sup> as monitored by resonance Raman spectroscopy.** The resonance Raman spectra of reduced Dcytb in the presence of various concentrations of Zn<sup>2+</sup> (red symbols) were obtained with 441.6 nm excitation. The Raman signals around 365~385 cm<sup>-1</sup> were deconvoluted as two Gaussian functions. Black traces represent the fit of these functions to the data. The Gaussian components at 374 cm<sup>-1</sup> (green) and 381 cm<sup>-1</sup> (blue) are shown.

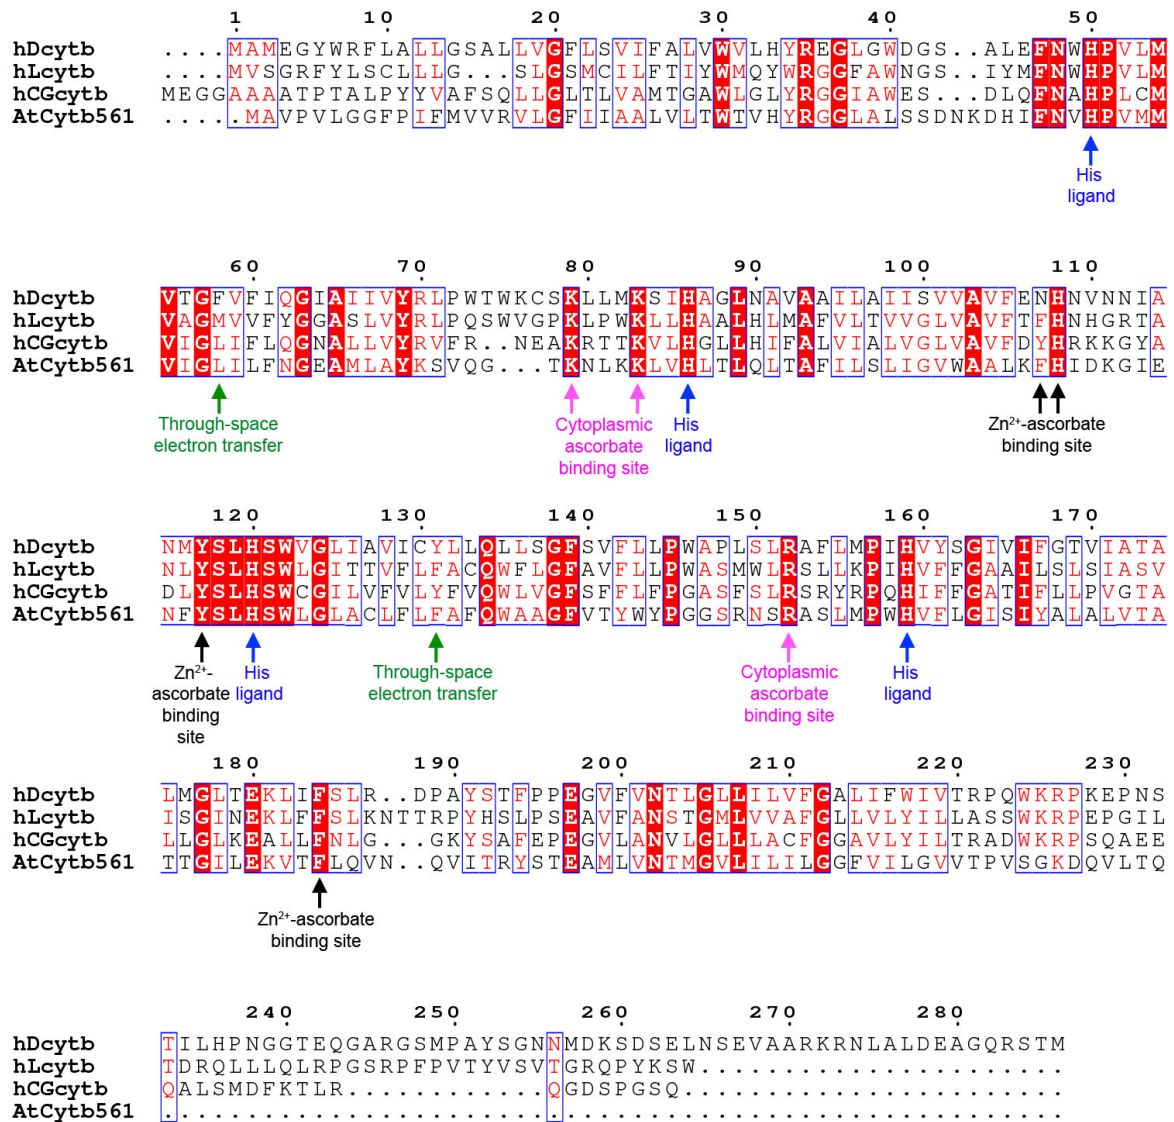

**Supplementary Fig. 6. Sequence alignment of Dcytb with *AtCytb561* and other human members of Cytb<sub>561</sub> family.** The four sequences shown here are duodenal Cytb (Dcytb), late-endosomal Cytb (Lcytb), chromaffin granule Cytb (CGcytb) from *Homo sapiens*, and Cytb<sub>561</sub> from *Arabidopsis thaliana* (*AtCytb561*). Residues conserved in all four sequences are highlighted in red. Dcytb has a C-terminal sequence that is longer than all other members of this family.

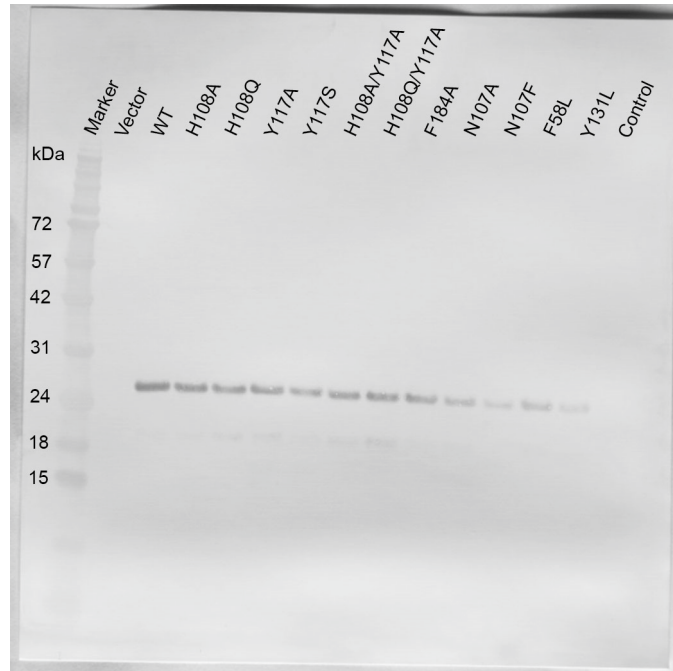

**Supplementary Fig. 7. Western blot analysis of whole cell lysate of Dcytb-expressed yeasts.** Uncropped membrane of western blot from Fig. 5b is shown. 1.0  $\mu\text{g}$  protein was loaded per lane, and expressed protein was detected by anti-human Dcytb mouse monoclonal antibody (homemade, clone 11-2.1)

**Supplementary Table 1. Comparison of dissociation constant and rate constant in the reaction of ascorbate-dependent heme reduction.**

|           | $K_s$ (mM) | $k_{\max}$ (s <sup>-1</sup> ) |
|-----------|------------|-------------------------------|
| Wild type | 0.68±0.07  | 330±10                        |
| K79S      | 0.81±0.05  | 165±4                         |
| K83S      | 1.1±0.2    | 270±20                        |
| R152E     | 1.1±0.2    | 170±10                        |
